# Supplementary material for: Colloidal synthesis of hexagonal CuFe(SxSe1−x)2 nanoplates with exposed highly active (220) facets for boosting overall water splitting
Source: Royal Society of Chemistry journal article supplement (doi:10.1039/d3qi00216k), 2023-01-01
Supplement: d3qi00216k1.pdf [file d3qi00216k1.pdf]

## Supporting Information

### **Colloid synthesis of hexagonal CuFe(S<sub>x</sub>Se<sub>1-x</sub>)<sub>2</sub> nanoplates with exposed highly-active (220) facets for boosting overall water splitting**

Shoushuang Huang,<sup>a</sup> Xiansheng Cong,<sup>a</sup> Tong Ye,<sup>a</sup> Libin Liu,<sup>a</sup> Kaimei Peng,<sup>\*b</sup> Lingchao Zhang,<sup>a</sup> Jinmei Bao,<sup>a</sup> Pengyan Gao,<sup>a</sup> Qiaochuan Chen<sup>\*c</sup>, and Qingquan He<sup>\*d</sup>

<sup>a</sup>School of Environmental and Chemical Engineering, Shanghai University, Shanghai 200444, China

<sup>b</sup>School of Chemistry and Chemical Engineering, Qiannan Normal University for Nationalities, Duyun 558000, China

<sup>c</sup>School of Computer Engineering and Science, Shanghai University, Shanghai, China

<sup>d</sup>College of Materials Science and Engineering, Zhejiang University of Technology, Hangzhou 310014, China

\*Corresponding authors:

K. Peng (pkmchem@sgmtu.edu.cn); Q. Chen, (qcchen@shu.edu.cn); Q. He (qqhe21@zjut.edu.cn);

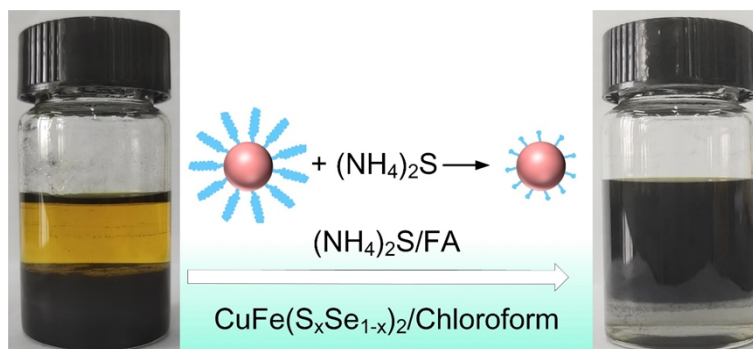

**Fig. S1.** Black colored colloidal dispersion of  $\text{CuFe}(\text{S}_x\text{Se}_{1-x})_2$  NPs undergoes the phase transfer from chloroform to formamide (FA) upon exchange of the original organic surface ligands with  $\text{S}^{2-}$ .

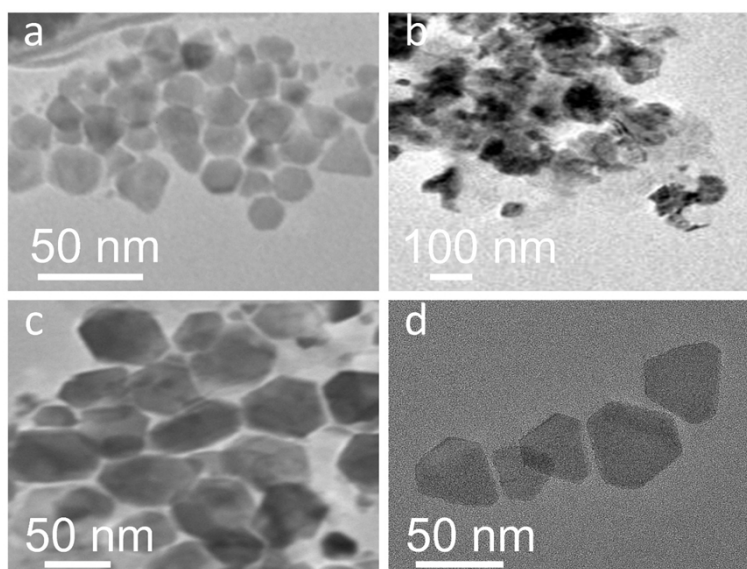

**Fig. S2.** TEM images of (a)  $\text{CuFeSe}_2$ , (b)  $\text{CuFe}(\text{S}_{0.45}\text{Se}_{0.55})_2$ , (c)  $\text{CuFe}(\text{S}_{0.63}\text{Se}_{0.37})_2$ , and (d)  $\text{CuFeS}_2$ .

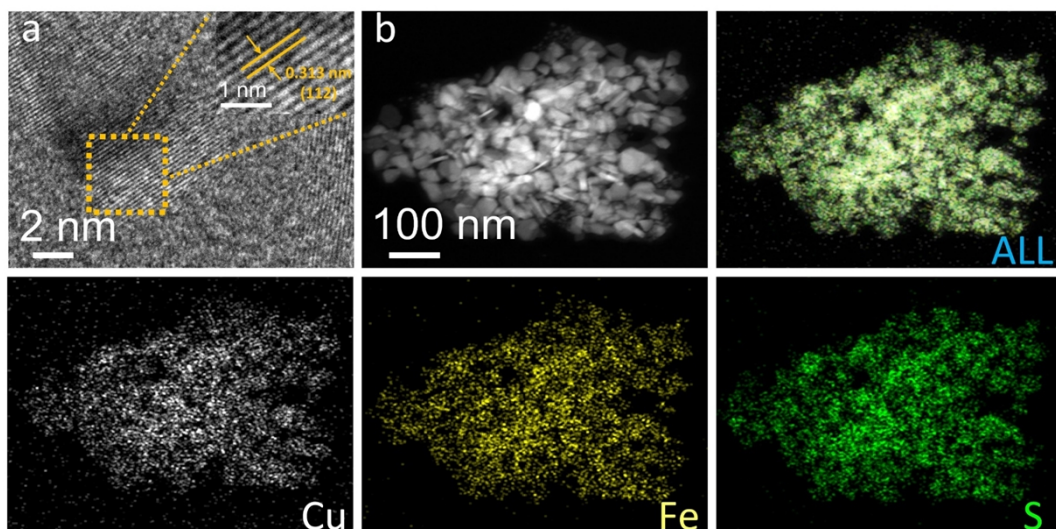

**Fig. S3.** HRTEM images (a) and EDS mapping images (b) of the CuFeS<sub>2</sub> samples.

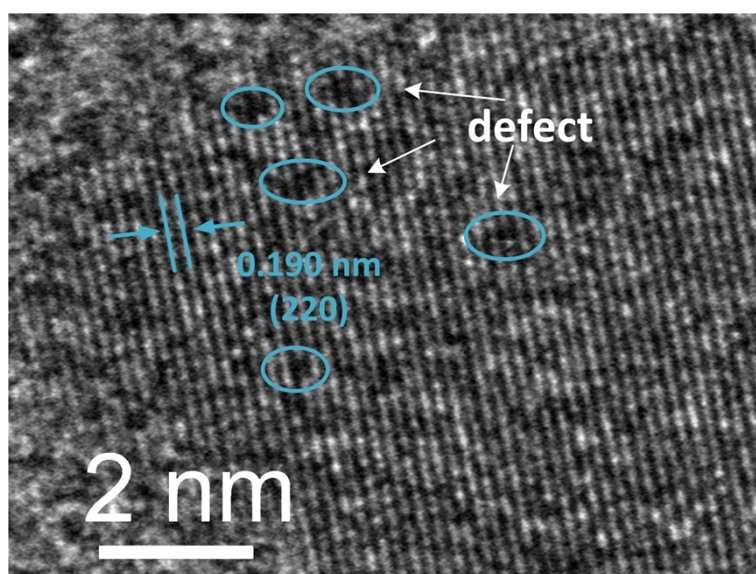

**Fig. S4.** The typical HRTEM image of a nanoplate derived from the as-synthesized CuFe(S<sub>0.8</sub>Se<sub>0.2</sub>)<sub>2</sub> catalyst.

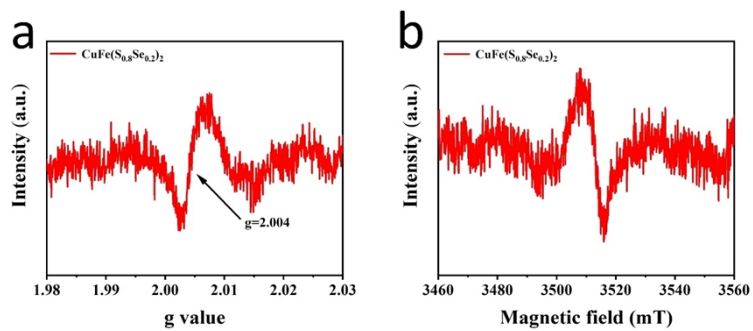

**Fig. S5.** EPR spectrum of the as-synthesized CuFe(S<sub>0.8</sub>Se<sub>0.2</sub>)<sub>2</sub> samples.

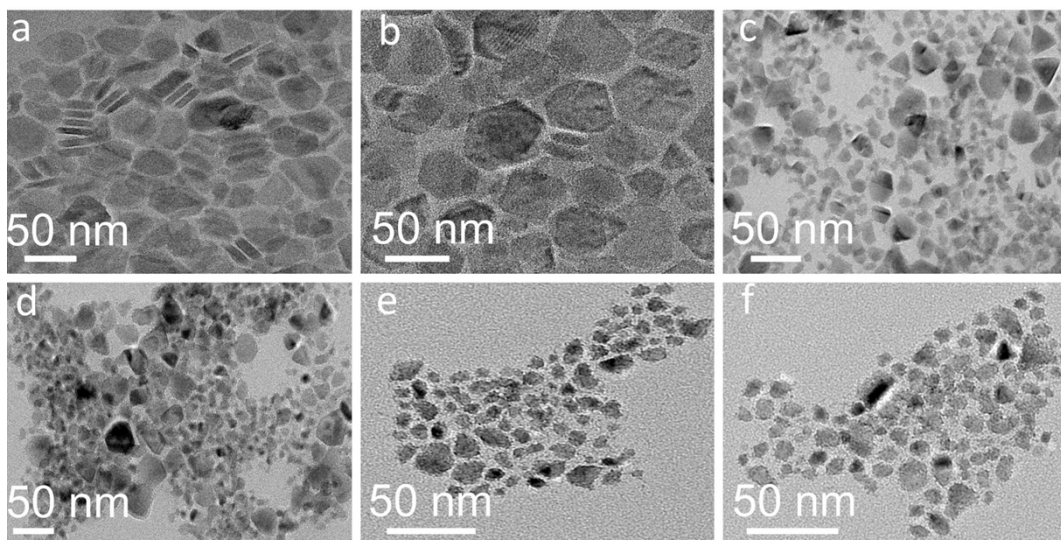

**Fig. S6.** TEM images of CuFe(S<sub>0.8</sub>Se<sub>0.2</sub>)<sub>2</sub> at different temperatures (a-b) 90 °C, (c-d) 135 °C, and (e-f) 180°C.

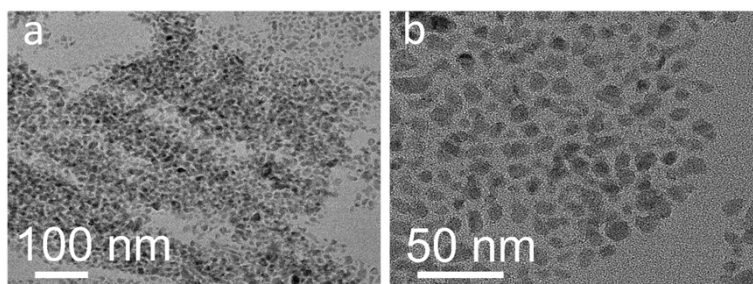

**Fig. S7.** TEM image of CuFe(S<sub>0.8</sub>Se<sub>0.2</sub>)<sub>2</sub> synthesized by 1-DDT instead of t-DDT.

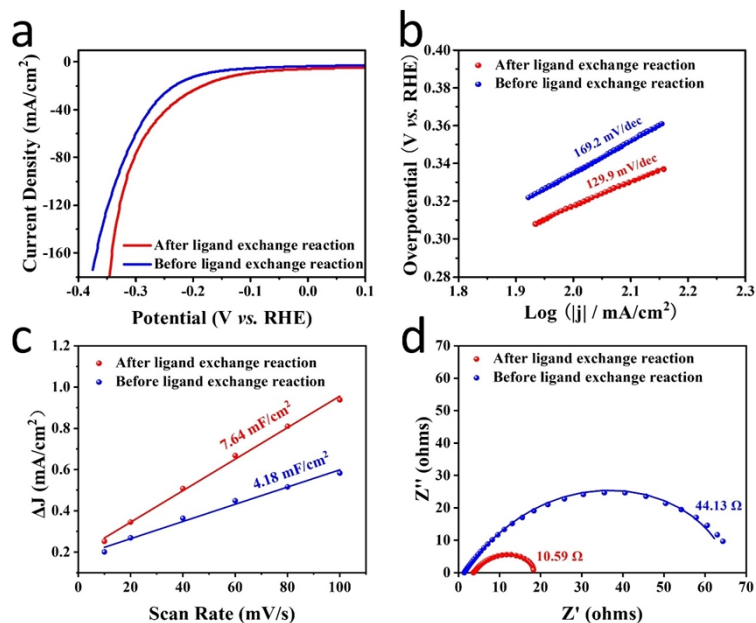

**Fig. S8.** HER performance in 1 M KOH solution. (a) LSV curves, (b) the Tafel plots, (c) the fitted  $C_{dl}$  and (d) Nyquist plots of the  $\text{CuFe}(\text{S}_{0.8}\text{Se}_{0.2})_2$  samples before/after ligand exchange reaction.

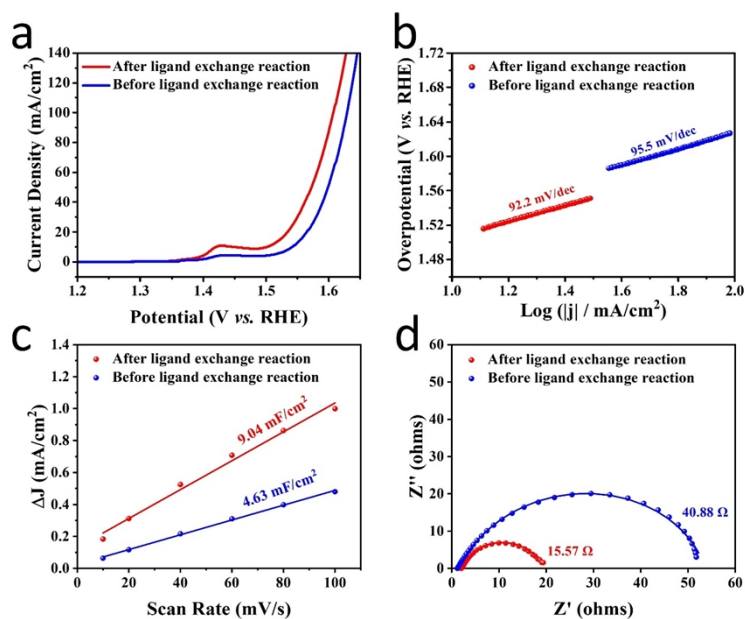

**Fig. S9.** OER performance in 1 M KOH solution. (a) LSV curves, (b) the Tafel plots, (c) the fitted  $C_{dl}$  and (d) Nyquist plots of the  $\text{CuFe}(\text{S}_{0.8}\text{Se}_{0.2})_2$  samples before/after ligand exchange reaction.

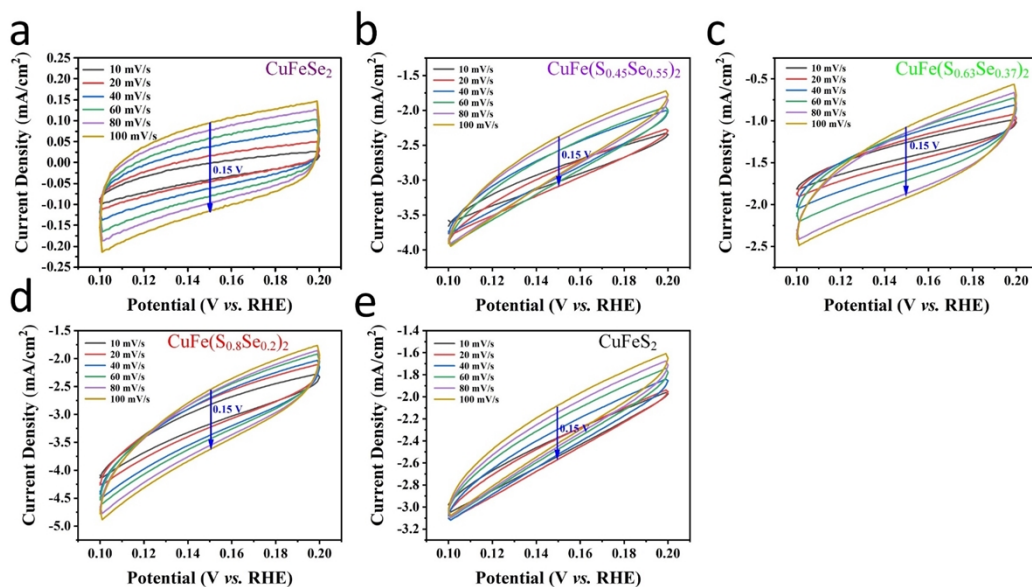

**Fig. S10.** CV curves of (a)  $\text{CuFeSe}_2$ , (b)  $\text{CuFe}(\text{S}_{0.45}\text{Se}_{0.55})_2$ , (c)  $\text{CuFe}(\text{S}_{0.63}\text{Se}_{0.37})_2$ , (d)  $\text{CuFe}(\text{S}_{0.8}\text{Se}_{0.2})_2$  and (e)  $\text{CuFeS}_2$  at different scan rates from 10 to 100 mV/s towards HER in 1.0 M KOH.

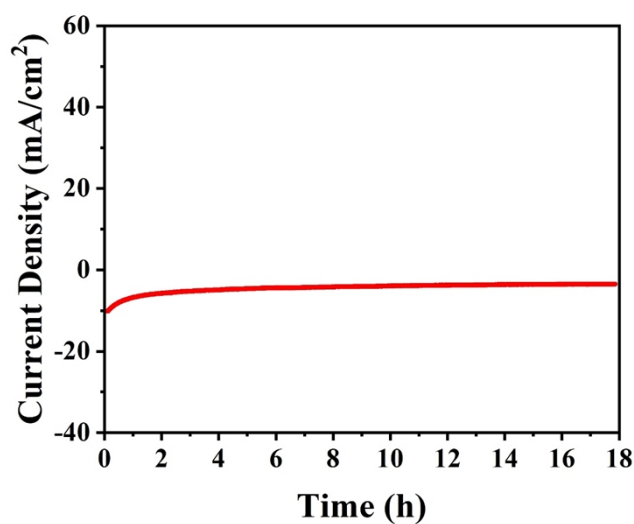

**Fig. S11.** The long stability tests of the  $\text{CuFe}(\text{S}_{0.8}\text{Se}_{0.2})_2$  catalysts in 1 M KOH.

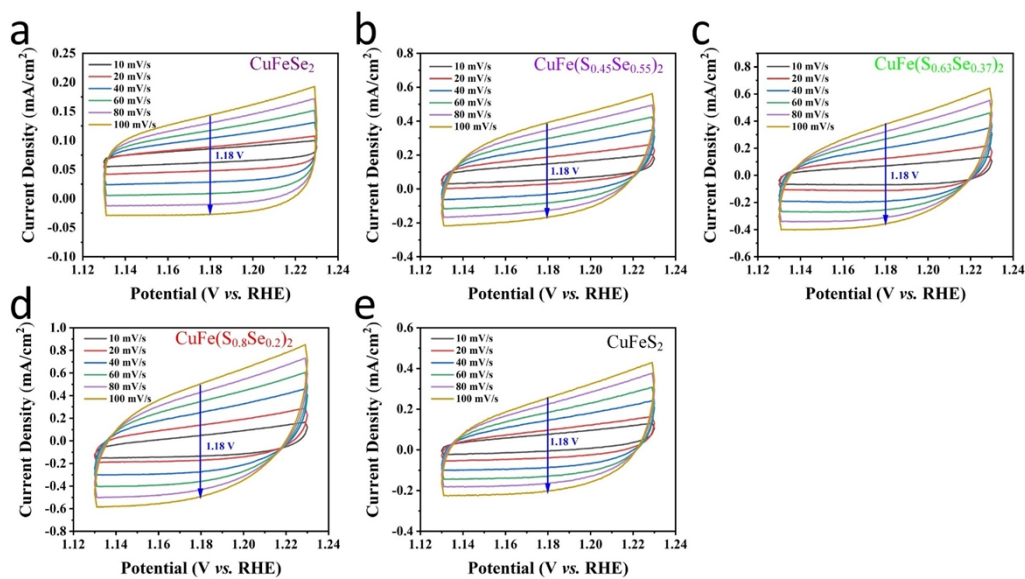

**Fig. S12.** CV curves of (a) CuFeSe<sub>2</sub>, (b) CuFe(S<sub>0.45</sub>Se<sub>0.55</sub>)<sub>2</sub>, (c) CuFe(S<sub>0.63</sub>Se<sub>0.37</sub>)<sub>2</sub>, (d) CuFe(S<sub>0.8</sub>Se<sub>0.2</sub>)<sub>2</sub> and (e) CuFeS<sub>2</sub> at different scan rates from 10 to 100 mV/s towards OER in 1.0 M KOH.

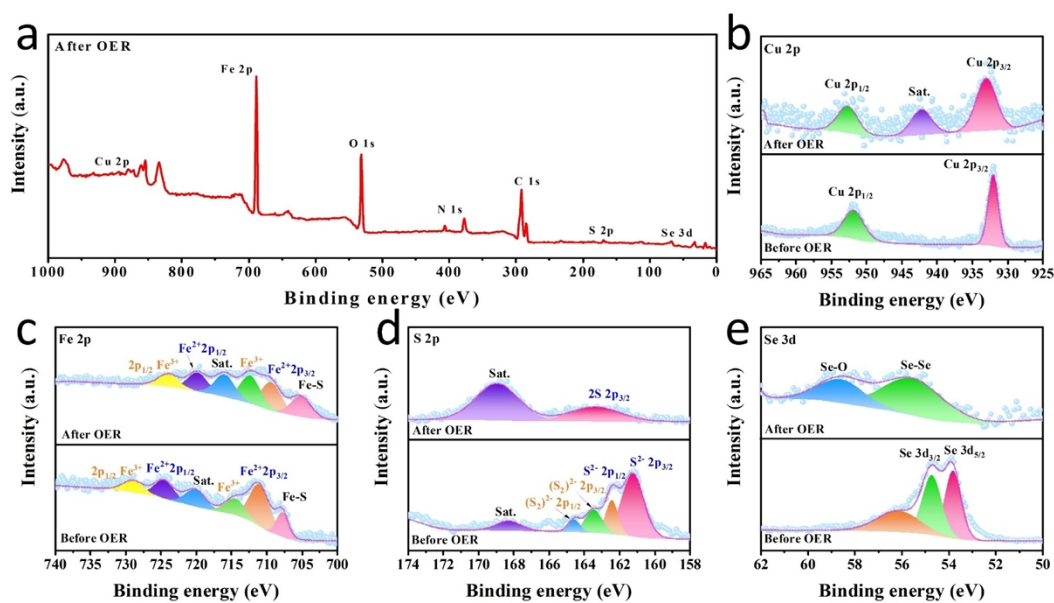

**Fig. S13.** XPS spectra for (a) survey, (b) Cu 2p, (c) Fe 2p, (d) S 2p, and (e) Se 3d of CuFe(S<sub>0.8</sub>Se<sub>0.2</sub>)<sub>2</sub> before and after OER stability test.

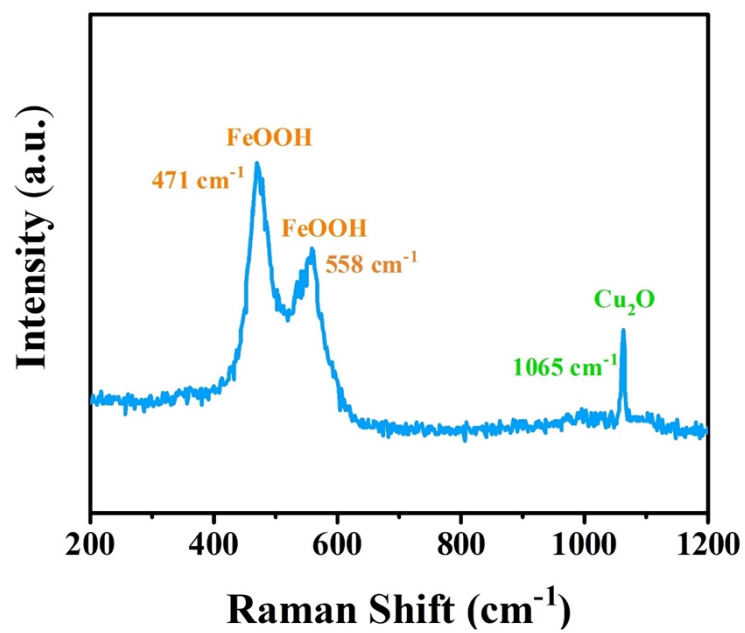

**Fig. S14.** Raman spectra of the  $\text{CuFe}(\text{S}_{0.8}\text{Se}_{0.2})_2$  catalysts after OER test.

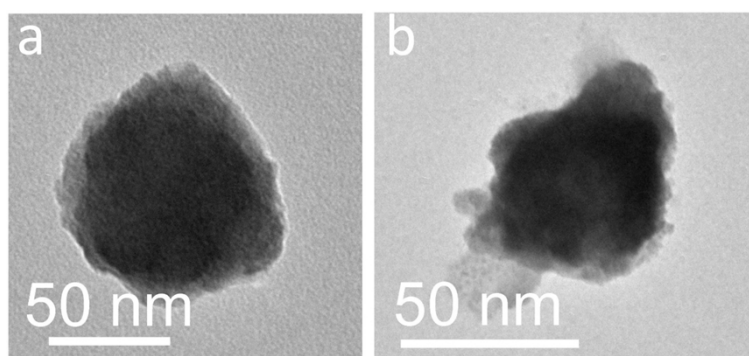

**Fig. S15.** The TEM images of the  $\text{CuFe}(\text{S}_{0.8}\text{Se}_{0.2})_2$  catalysts after OER test.



**Table S1**EDX results for  $\text{CuFe}(\text{S}_x\text{Se}_{1-x})_2$  catalysts.

| Catalysts                                        | Cu:Fe:S:Se atom ratio from EDS |
|--------------------------------------------------|--------------------------------|
| $\text{CuFeSe}_2$                                | 31.99 : 19.37 : 48.64          |
| $\text{CuFe}(\text{S}_{0.45}\text{Se}_{0.55})_2$ | 25.24 : 22.16 : 23.78 : 28.82  |
| $\text{CuFe}(\text{S}_{0.63}\text{Se}_{0.37})_2$ | 27.06 : 20.55 : 33.15 : 19.24  |
| $\text{CuFe}(\text{S}_{0.8}\text{Se}_{0.2})_2$   | 34.62 : 17.69 : 38.28 : 9.41   |
| $\text{CuFeS}_2$                                 | 27.93 : 20.63 : 51.44          |

**Table S2**ICP results for  $\text{CuFe}(\text{S}_{0.8}\text{Se}_{0.2})_2$  catalysts.

| Catalysts                                      | Cu:Fe:S:Se ratio from ICP   |
|------------------------------------------------|-----------------------------|
| $\text{CuFe}(\text{S}_{0.8}\text{Se}_{0.2})_2$ | 28.27 : 28.34 : 34.9 : 8.49 |

**Table S3**Equivalent circuit fitting parameters for the  $\text{CuFe}(\text{S}_x\text{Se}_{1-x})_2$  catalysts.

| electrolyte      | Catalysts                                        | $R_s$ ( $\Omega$ ) | $R_{ct}$ ( $\Omega$ ) |
|------------------|--------------------------------------------------|--------------------|-----------------------|
| 1 M KOH<br>(HER) | $\text{CuFeSe}_2$                                | 1.89               | 304.4                 |
|                  | $\text{CuFe}(\text{S}_{0.45}\text{Se}_{0.55})_2$ | 1.161              | 104                   |
|                  | $\text{CuFe}(\text{S}_{0.63}\text{Se}_{0.37})_2$ | 2.345              | 27.41                 |
|                  | $\text{CuFe}(\text{S}_{0.8}\text{Se}_{0.2})_2$   | 3.667              | 10.59                 |
|                  | $\text{CuFeS}_2$                                 | 2.167              | 213.4                 |
| 1 M KOH<br>(OER) | $\text{CuFeSe}_2$                                | 2.916              | 192.8                 |
|                  | $\text{CuFe}(\text{S}_{0.45}\text{Se}_{0.55})_2$ | 1.585              | 78.41                 |
|                  | $\text{CuFe}(\text{S}_{0.63}\text{Se}_{0.37})_2$ | 2.295              | 28.53                 |
|                  | $\text{CuFe}(\text{S}_{0.8}\text{Se}_{0.2})_2$   | 1.843              | 15.57                 |
|                  | $\text{CuFeS}_2$                                 | 1.709              | 145.3                 |

**Table S4**

The OER activity of the  $\text{CuFe}(\text{S}_{0.8}\text{Se}_{0.2})_2$  catalyst in this work. Comparison with recently reported transition metal-based chalcogenides electrocatalysts.

| Catalyst                                       | Electrode | Electrolyte | Overpotential<br>(mV) at 10<br>$\text{mA}/\text{cm}^2$ | References |
|------------------------------------------------|-----------|-------------|--------------------------------------------------------|------------|
| $\text{MoSe}_2\text{-Cu}_2\text{S}$            | GCE       | 1 M KOH     | 264                                                    | 1          |
| $\text{MoS}_2/\text{NiS}_2\text{-3}$           | CC        | 1 M KOH     | 278                                                    | 2          |
| CuSe                                           | NF        | 1 M KOH     | 297                                                    | 3          |
| CuFe/NF                                        | NF        | 1 M KOH     | 218                                                    | 4          |
| Cu@CoFe LDH                                    | CF        | 1 M KOH     | 240                                                    | 5          |
| $\text{NiS}_2/\text{MoS}_2\text{-2}$           | CC        | 1 M KOH     | 270                                                    | 6          |
| $\text{CuFeS}_2$                               | NF        | 1 M KOH     | 320                                                    | 7          |
| Co-Fe(1/1)-Se                                  | GCE       | 1 M KOH     | 270                                                    | 8          |
| $\text{CoFe}_{0.7}\text{Se}_{1.7}$             | CP        | 1 M KOH     | 279                                                    | 9          |
| $\text{Fe}_7\text{S}_8/\text{FeS}_2/\text{C}$  | NF        | 1 M KOH     | 262                                                    | 10         |
| $\text{CuFe}(\text{S}_{0.8}\text{Se}_{0.2})_2$ | NF        | 1 M KOH     | 271                                                    | This work  |

NF: Ni foam; GCE: glassy carbon electrode; CF: Cu foam;

**Table S5**

The OWS activity of the  $\text{CuFe}(\text{S}_{0.8}\text{Se}_{0.2})_2$  catalyst in this work. Comparison with recently reported transition metal-based chalcogenides electrocatalysts.

| Catalyst                                                         | Electrode | Electrolyte | Overpotential<br>(mV) at 10<br>$\text{mA}/\text{cm}^2$ | References |
|------------------------------------------------------------------|-----------|-------------|--------------------------------------------------------|------------|
| $\text{MoS}_2/\text{NiS}_2$ -3                                   | CC        | 1 M KOH     | 1.59                                                   | 2          |
| CuSe                                                             | NF        | 1 M KOH     | 1.68                                                   | 3          |
| CuFe/NF                                                          | NF        | 1 M KOH     | 1.64                                                   | 4          |
| Cu@CoFe LDH                                                      | Cu foam   | 1 M KOH     | 1.68                                                   | 5          |
| $\text{CuFeS}_2$                                                 | NF        | 1 M KOH     | 1.66                                                   | 7          |
| Co-Fe(1/1)-Se                                                    | GCE       | 1 M KOH     | 1.68                                                   | 8          |
| $\text{Fe}_7\text{S}_8/\text{FeS}_2/\text{C}$                    | NF        | 1 M KOH     | 1.67                                                   | 10         |
| $\text{Co}_9\text{S}_8\text{-Ni}_3\text{S}_2\text{-}$<br>CNTs/NF | NF        | 1 M KOH     | 1.65                                                   | 11         |
| EG/ $\text{Co}_{0.85}\text{Se}/\text{NiFeLDH}$                   | EG        | 1 M KOH     | 1.67                                                   | 12         |
| Fe-doped NiS– $\text{NiS}_2$                                     | NF        | 1 M KOH     | 1.59                                                   | 13         |
| $\text{CuFe}(\text{S}_{0.8}\text{Se}_{0.2})_2$                   | NF        | 1 M KOH     | 1.61                                                   | This work  |

NF: Ni foam; GCE: glassy carbon electrode; CF: Cu foam;

## References

1. M. S. Hassan, P. Basera, S. Gahlawat, P. P. Ingole, S. Bhattacharya and S. Sapra, Understanding the efficient electrocatalytic activities of MoSe<sub>2</sub>-Cu<sub>2</sub>S nanoheterostructures, *J. Mater. Chem. A*, 2021, **9**, 9837-9848.
2. J. H. Lin, P. C. Wang, H. H. Wang, C. Li, X. Q. Si, J. L. Qi, J. Cao, Z. X. Zhong, W. D. Fei and J. C. Feng, Defect-Rich Heterogeneous MoS<sub>2</sub>/NiS<sub>2</sub> Nanosheets Electrocatalysts for Efficient Overall Water Splitting, *Adv. Sci.*, 2019, **6**, 1900246.
3. B. Chakraborty, R. Beltran-Suito, V. Hlukhyy, J. Schmidt, P. W. Menezes and M. Driess, Crystalline Copper Selenide as a Reliable Non-Noble Electro(pre)catalyst for Overall Water Splitting, *Chemsuschem*, 2020, **13**, 3222-3229.
4. A. I. Inamdar, H. S. Chavan, B. Hou, C. H. Lee, S. U. Lee, S. Cha, H. Kim and H. Im, A Robust Nonprecious CuFe Composite as a Highly Efficient Bifunctional Catalyst for Overall Electrochemical Water Splitting, *Small*, 2020, **16**, e1905884.
5. L. Yu, H. Q. Zhou, J. Y. Sun, F. Qin, D. Luo, L. X. Xie, F. Yu, J. M. Bao, Y. Li, Y. Yu, S. Chen and Z. F. Ren, Hierarchical Cu@CoFe layered double hydroxide core-shell nanoarchitectures as bifunctional electrocatalysts for efficient overall water splitting, *Nano Energy*, 2017, **41**, 327-336.
6. Y. Qian, J. Yu, Y. Zhang, F. Zhang, Y. Kang, C. Su, H. Shi, D. J. Kang and H. Pang, Interfacial Microenvironment Modulation Enhancing Catalytic Kinetics of Binary Metal Sulfides Heterostructures for Advanced Water Splitting Electrocatalysts, *Small Methods*, 2022, **6**, 2101186.
7. A. Sathyaseelan, D. Kesavan, S. Manoharan, V. K. Mariappan, K. Krishnamoorthy and S. J. Kim, Thermoelectric Driven Self-Powered Water Electrolyzer Using Nanostructured CuFeS<sub>2</sub> Plates as Bifunctional Electrocatalyst, *ACS Appl. Energy Mater.*, 2021, **4**, 7020-7029.
8. F. O. Boakye, Y. Li, K. A. Owusu, I. S. Amiin, Y. P. Cheng and H. N. Zhang, One-step synthesis of heterostructured cobalt-iron selenide as bifunctional catalyst for overall water splitting, *Mater. Chem. Phys.*, 2022, **275**, 125201.
9. X. Y. Wang, Y. Zhou, M. Liu, C. Chen and J. Zhang, Colloidal synthesis of high-performance FeSe/CoSe nanocomposites for electrochemical oxygen evolution reaction, *Electrochim. Acta.*, 2019, **297**, 197-205.

10. Y. Xu, T. T. Feng, Z. J. Cui, P. F. Guo, W. P. Wang and Z. C. Li, Fe<sub>7</sub>S<sub>8</sub>/FeS<sub>2</sub>/C as an efficient catalyst for electrocatalytic water splitting, *Int. J. Hydrogen Energy*, 2021, **46**, 39216-39225.
11. Y. Yao, J. He, L. Ma, J. Wang, L. Peng, X. Zhu, K. Li and M. Qu, Self-supported Co<sub>9</sub>S<sub>8</sub>-Ni<sub>3</sub>S<sub>2</sub>-CNTs/NF electrode with superwetting multistage micro-nano structure for efficient bifunctional overall water splitting, *J. Colloid. Interf. Sci.*, 2022, **616**, 287-297.
12. Y. Hou, M. R. Lohe, J. Zhang, S. H. Liu, X. D. Zhuang and X. L. Feng, Vertically oriented cobalt selenide/NiFe layered-double-hydroxide nanosheets supported on exfoliated graphene foil: an efficient 3D electrode for overall water splitting, *Energy Environ. Sci.*, 2016, **9**, 478-483.
13. S. S. Huang, Q. Zhang, P. J. Xin, J. Zhang, Q. C. Chen, J. Fu, Z. Q. Jin, Q. Wang and Z. J. Hu, Construction of Fe-doped NiS-NiS<sub>2</sub> Heterostructured Microspheres Via Etching Prussian Blue Analogues for Efficient Water-Urea Splitting, *Small*, 2022, e2106841.
